# Supplementary material
Source: Springer Nature journal article supplement (https://www.springermedizin.de/resource/supplementary/13058_2010_9495_MOESM3_ESM.pdf/9702272)

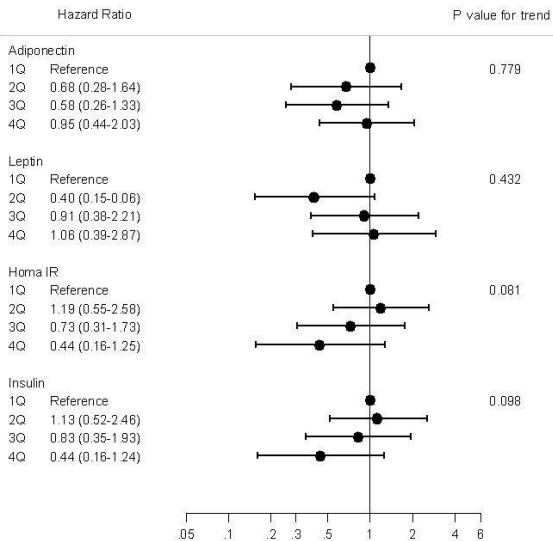

(a) ER/PR-negative status

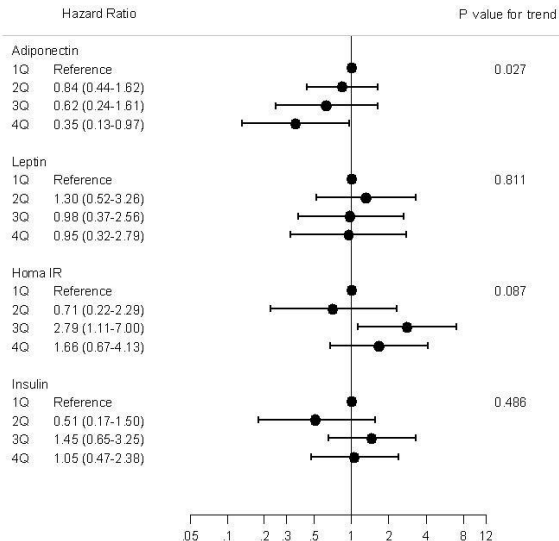

(b) ER/PR-positive status

Supplement: MOESM3 [file 9702272]
